# Supplementary material for: An age-independent gene signature for monitoring acute rejection in kidney transplantation
Source: PubMed Central journal article supplement (PMC7295062; doi:10.7150/thno.42110), 2020-05-25
Supplement: thnov10p6977s1.pdf [file thnov10p6977s1.pdf]

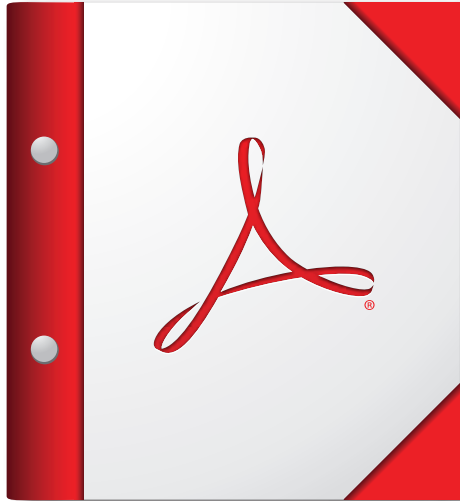

**For the best experience, open this PDF portfolio in  
Acrobat X or Adobe Reader X, or later.**

[Get Adobe Reader Now!](#)
